# Supplementary material
Source: MDPI journal article supplement (https://www.mdpi.com/2073-445X/11/12/2212)
Supplement: s1 [file s1]

**Table S1.** Land use and land cover changes with ecosystem service values of different areas in Ethiopia.

| LULC classes       | LULC classes (ha) |                | Time interval |        | LULC Percentage Change | ESV (USD million) |          | Change | Description of the study setting                                                                                                                | Sampled references           |
|--------------------|-------------------|----------------|---------------|--------|------------------------|-------------------|----------|--------|-------------------------------------------------------------------------------------------------------------------------------------------------|------------------------------|
|                    | Initial area (A)  | Final area (B) | Year A        | Year B |                        | @ Year A          | @ Year B |        |                                                                                                                                                 |                              |
| Cultivated         | 3,202.78          | 3,493.17       | 1973          | 2015   | 9.1                    | 0.29              | 0.321    | 0.031  | A typical dry<br>afromontane forest<br>vegetation of 76.87 km <sup>2</sup><br>Chillimo forest area                                              | Tolessa <i>et al.</i> , 2017 |
| Settlement         | 5.36              | 341.64         | 1973          | 2015   | 6273.9                 | 0.00              | 0        | 0      |                                                                                                                                                 |                              |
| Shrub land         | 216               | 1,161.36       | 1973          | 2015   | 437.7                  | 0.21              | 0.13     | 0.08   |                                                                                                                                                 |                              |
| Forest land        | 4,263.12          | 1,952.01       | 1973          | 2015   | -54.2                  | 8.56              | 3.92     | -4.64  |                                                                                                                                                 |                              |
| Bare land          | 0                 | 739.08         | 1973          | 2015   | 739.08                 | 0                 | 0        | 0      |                                                                                                                                                 |                              |
| Cultivated         | 36,820            | 45,108         | 1985          | 2015   | 22.5                   | 8.31              | 10.17    | 1.86   | A 587.6 km <sup>2</sup> watershed<br>with excessive pressure<br>from agricultural<br>expansion                                                  | Gashaw <i>et al.</i> , 2018  |
| Settlement         | 35                | 672            | 1985          | 2015   | 1820                   | 0.00              | 0.0      | 0      |                                                                                                                                                 |                              |
| Shrub land         | 15,377            | 8,992          | 1985          | 2015   | -41.52                 | 15.17             | 8.87     | -6.3   |                                                                                                                                                 |                              |
| Forest land        | 2,068             | 1,138          | 1985          | 2015   | -44.97                 | 2.04              | 1.12     | -0.92  |                                                                                                                                                 |                              |
| Grassland          | 4,461             | 2,850          | 1985          | 2015   | -36.11                 | 1.31              | 0.84     | -0.47  |                                                                                                                                                 |                              |
| Crop land          | 13,498            | 50,317         | 1973          | 2012   | 272.8                  | 1.2               | 4.6      | 3.4    | A 1091 km <sup>2</sup> area and<br>characterized by mixed<br>farming system                                                                     | Kindu <i>et al.</i> , 2016   |
| Settlement         | 439               | 1586           | 1973          | 2012   | 261.3                  | 0.0               | 0.0      | 0.0    |                                                                                                                                                 |                              |
| Woodlands          | 11,842            | 656            | 1973          | 2012   | -94.46                 | 23.8              | 1.3      | -22.5  |                                                                                                                                                 |                              |
| Natural forests    | 21,726            | 9,588          | 1973          | 2012   | -55.9                  | 43.6              | 19.3     | -24.3  |                                                                                                                                                 |                              |
| Grassland          | 43,830            | 25,139         | 1973          | 2012   | -42.64                 | 10.7              | 6.1      | -4.6   |                                                                                                                                                 |                              |
| Plantation forests | 0                 | 1284           | 1973          | 2012   |                        | 0.0               | 2.6      | 2.6    |                                                                                                                                                 |                              |
| Water              | 9,976             | 9,871          | 1973          | 2012   | -1.05                  | 84.8              | 83.9     | -0.9   |                                                                                                                                                 |                              |
| Tree patches       | 2,021             | 3,606          | 1973          | 2012   | 78.43                  | 0.5               | 0.9      | 0.4    |                                                                                                                                                 |                              |
| Bare land          | 343               | 1765           | 1973          | 2012   | 414.6                  | 0.0               | 0.0      | 0.0    |                                                                                                                                                 |                              |
| Cultivated land    | 13424.5           | 43286.4        | 1973          | 2014   | 222.44                 | 1.24              | 3.98     | 2.74   | A 72,697.2-ha area with<br>an estimated<br>population density of<br>198 persons per km <sup>2</sup><br>and is characterized by<br>mixed farming | Tolessa <i>et al.</i> , 2016 |
| Shrub/bush land    | 19531.7           | 20683.9        | 1973          | 2014   | -67.23                 | 18.9              | 6.20     | -12.7  |                                                                                                                                                 |                              |
| Grass land         | 12298.4           | 6562.5         | 1973          | 2014   | -46.64                 | 2.85              | 1.5      | -1.35  |                                                                                                                                                 |                              |
| Forest land        | 14955.1           | 2507.32        | 1973          | 2014   | -83.23                 | 30.01             | 5.03     | -24.98 |                                                                                                                                                 |                              |
| Settlement         | 1202.13           | 6869.82        | 1973          | 2014   | 471.47                 | 0.0               | 0.0      | 0.0    |                                                                                                                                                 |                              |
| Bare land          | 11285.38          | 7069.74        | 1973          | 2014   | -37.35                 | 0.0               | 0.0      | 0.0    |                                                                                                                                                 |                              |
| Cultivated land    | 593,175           | 666,489        | 1986          | 2021   | 12.4                   | 133.8             | 150.3    | 16.5   | An area that ranges<br>from between 1646                                                                                                        | Biratu <i>et al.</i> , 2022  |
| Settlement         | 1,462             | 7,880          | 1986          | 2021   | 439.2                  | 0.0               | 0.0      | 0.0    |                                                                                                                                                 |                              |

|                                  |         |         |      |      |       |        |        |        |                                                                                                                   |
|----------------------------------|---------|---------|------|------|-------|--------|--------|--------|-------------------------------------------------------------------------------------------------------------------|
| Shrub-bush land                  | 245,398 | 182,237 | 1986 | 2021 | -25.7 | 72.0   | 53.4   | -18.5  | masl nearby Lake Zeway and 4171 masl on the ridges of Chilalo mountain covering a total of 10,074 km <sup>2</sup> |
| Forest land                      | 26,432  | 16,677  | 1986 | 2021 | -36.9 | 26.1   | 16.5   | -9.6   |                                                                                                                   |
| Bare land                        | 21,502  | 40,945  | 1986 | 2021 | 90.4  | 0.0    | 0.0    | 0.0    |                                                                                                                   |
| Water body                       | 82,489  | 81,584  | 1986 | 2021 | -1.1  | 668.4  | 653.7  | -7.3   |                                                                                                                   |
| Wetland                          | 10,664  | 6,572   | 1986 | 2021 | -38.4 | 86.4   | 53.3   | -33.2  |                                                                                                                   |
| Grazing land                     | 26,230  | 4,967   | 1986 | 2021 | -81.1 | 7.7    | 1.5    | -6.2   |                                                                                                                   |
| Inland waters                    | 1,432.4 | 1,434.1 | 1985 | 2010 | 0.12  | 1792.2 | 1794.4 | 2.1    | An area of about 18,600 km <sup>2</sup> that ranges from 1082 near the lakeshore – 3500 masl in the highlands     |
| Forests                          | 531.6   | 522.5   | 1985 | 2010 | -1.7  | 286    | 281.2  | -4.9   |                                                                                                                   |
| Shrubland                        | 4478.9  | 3188.2  | 1985 | 2010 | -28.8 | 2410.1 | 1715.6 | -694.5 |                                                                                                                   |
| Arable land                      | 4454    | 7088.6  | 1985 | 2010 | 59.2  | 2480   | 3946.9 | 1466.9 |                                                                                                                   |
| Heterogeneous agricultural areas | 2519.1  | 2162.1  | 1985 | 2010 | -14.2 | 1402.6 | 1203.9 | -189.8 |                                                                                                                   |
| Coffee agroforestry              | 2226.3  | 2216.8  | 1985 | 2010 | -0.43 | 1670.6 | 1663.5 | -7.1   |                                                                                                                   |
| Natural grassland                | 3205.7  | 2143.8  | 1985 | 2010 | -33.1 | 1335.5 | 893.1  | -442.4 |                                                                                                                   |
| Inland wetlands                  | 291.2   | 365.5   | 1985 | 2010 | 25.5  | 747.8  | 938.6  | 190.8  |                                                                                                                   |
| Built-up areas                   | 7.5     | 25      | 1985 | 2010 | 233.3 | 5      | 16.7   | 11.7   |                                                                                                                   |
| Cultivated land                  | 101038  | 123977  | 2000 | 2020 | 22.7  | 22.8   | 28     | 5.2    | An area of about 1583 km <sup>2</sup> that ranges from 1785 to 4084 masl in the Upper Blue Nile basin             |
| Forest                           | 10460   | 5623    | 2000 | 2020 | -46.2 | 10.3   | 5.5    | -4.8   |                                                                                                                   |
| Shrubland                        | 25182   | 13984   | 2000 | 2020 | -44.5 | 24.8   | 13.8   | -11    |                                                                                                                   |
| Grassland                        | 20524   | 11999   | 2000 | 2020 | -41.5 | 6      | 3.5    | -2.5   |                                                                                                                   |
| Waterbody                        | 586     | 1056    | 2000 | 2020 | 80    | 4.7    | 8.5    | 3.8    |                                                                                                                   |
| Settlement                       | 843     | 1993    | 2000 | 2020 | 136.5 | 0      | 0      | 0      |                                                                                                                   |

NB: ESV = Ecosystem Service Value, VC<sub>k</sub> = Value coefficient of land use and land cover type 'K'.

Sources : Gashew et al. [9]; Tolessa et al., [5]; [56]; Kindu et al., [1]; Biratu et al. [71]; Woldeyohannes et al. [73]; Anley et al. [72] and some calculations of this data were made by the authors.
